CORRECTION

# Correction: Neutral and Adaptive Drivers of Microgeographic Genetic Divergence within Continuous Populations: The Case of the Neotropical Tree *Eperua falcata* (Aubl.)

The *PLOS ONE* Staff

## Notice of Republication

This article was republished on April 10, 2015, to correct Figs. 5, which were distorted during the production process. The publisher apologizes for the error. Please download this article again to view the correct version. The originally published, uncorrected article and the republished, corrected article are provided here for reference.

## Supporting Information

**S1 File. Originally published, uncorrected article.**

(PDF)

**S2 File. Republished, corrected article.**

(PDF)

## Reference

1. Brousseau L, Foll M, Scotti-Saintagne C, Scotti I (2015) Neutral and Adaptive Drivers of Microgeographic Genetic Divergence within Continuous Populations: The Case of the Neotropical Tree *Eperua falcata* (Aubl.). *PLoS ONE* 10(3): e0121394. doi: [10.1371/journal.pone.0121394](https://doi.org/10.1371/journal.pone.0121394) PMID: [25807272](https://pubmed.ncbi.nlm.nih.gov/25807272/)

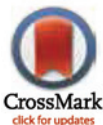

## OPEN ACCESS

**Citation:** The *PLOS ONE* Staff (2015) Correction: Neutral and Adaptive Drivers of Microgeographic Genetic Divergence within Continuous Populations: The Case of the Neotropical Tree *Eperua falcata* (Aubl.). *PLoS ONE* 10(4): e0127134. doi:10.1371/journal.pone.0127134

**Published:** April 22, 2015

**Copyright:** © 2015 The PLOS ONE Staff. This is an open access article distributed under the terms of the [Creative Commons Attribution License](https://creativecommons.org/licenses/by/4.0/), which permits unrestricted use, distribution, and reproduction in any medium, provided the original author and source are credited.
